# Supplementary material for: Highly Sensitive and Selective Detection of Hydrogen Using Pd-Coated SnO2 Nanorod Arrays for Breath-Analyzer Applications
Source: MDPI journal article supplement (doi:10.3390/s22052056), 2022-03-07
Supplement: s1 [file s1]

## *Supplementary Material*

### **Highly sensitive and selective detection of hydrogen using Pd-coated SnO<sub>2</sub> nanorod arrays for breath-analyzer applications**

Hwaebong Jung<sup>1</sup>, Junho Hwang<sup>1</sup>, Yong-Sahm Choe<sup>2</sup>, Hyun-Sook Lee<sup>1,\*</sup>, Wooyoung Lee<sup>1,\*</sup>

<sup>1</sup> Department of Materials Science and Engineering, Yonsei University, 50 Yonseiro, Seodaemun-gu, Seoul, 03722, Republic of Korea

<sup>2</sup> Isenlab Inc., Halla Sigma Valley, Dunchon-daero 545, Jungwon-gu, Seongnam-si, Gyeonggi-do, 13215, Republic of Korea

\* Corresponding author email: wooyoung@yonsei.ac.kr (W. Lee), h-slee@yonsei.ac.kr (H.-S. Lee)

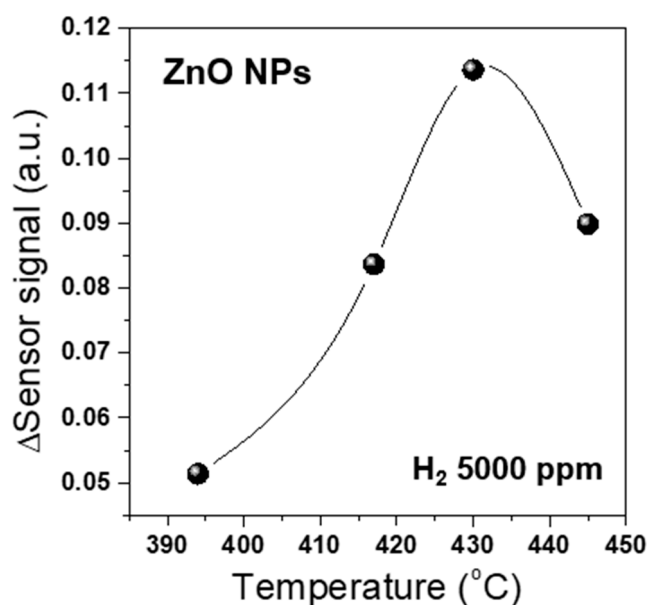

**Figure S1.**  $\Delta$  Sensor signal of ZnO nanoparticles integrated into the mini-GC to 5000 ppm (0.5%) hydrogen as a function of operating temperature.
